# Supplementary material
Source: publisher figshare collection journal article supplement (https://acs.figshare.com/ndownloader/files/3900880)
Supplement: Supplementary file 1 [file 3900880]

# Supplementary Data

## Mapping Central $\alpha$ -Helix Linker Mediated Conformational Transition Pathway of Calmodulin via Simple Computational Approach

Jinan Wang,<sup>1§</sup> Shaoliang Peng,<sup>2,§</sup> Benjamin P. Cossins,<sup>3</sup> Xiangke Liao<sup>2,</sup>, Kaixian Chen,<sup>1</sup> Qiang Shao,<sup>1\*</sup> Xiaoqian Zhu<sup>2,\*</sup>, Jiye Shi,<sup>3,\*</sup> Weiliang Zhu<sup>1</sup>

<sup>1</sup>Drug Discovery and Design Center, Key Laboratory of Receptor Research, Shanghai Institute of Materia Medica, Chinese Academy of Sciences, 555 Zuchongzhi Road, Shanghai, 201203, China

<sup>2</sup>School of Computer Science & State Key Laboratory of High Performance Computing, National University of Defense Technology, No.47, Yanwachi Street, Kaifu District, Changsha, Hunan 410073, China

<sup>3</sup>UCB Pharma, 216 Bath Road, Slough SL1 4EN, United Kingdom

<sup>§</sup>These authors contributed equally to the work.

\*To whom correspondence should be addressed. Qiang Shao, Tel: +86 21 50806600-1304, E-mail: [qshao@mail.shcnc.ac.cn](mailto:qshao@mail.shcnc.ac.cn); Xiaoqian Zhu, E-mail: [zhu\\_xiaoqian@nudt.edu.cn](mailto:zhu_xiaoqian@nudt.edu.cn); Jiye Shi, [Jiye.Shi@ucb.com](mailto:Jiye.Shi@ucb.com)

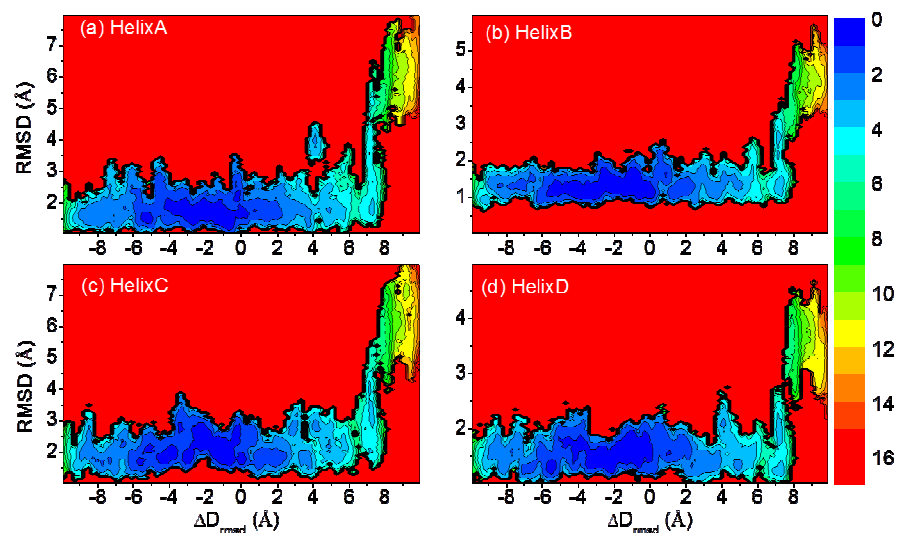

Figure S1. Two-dimensional free energy profiles as the function of  $\Delta D_{rmsd}$  of intact apo-CaM and the RMSD value of individual helices within N-terminal domain to their respective closed states. The contours are spaced at intervals of 1.0 kcal/mol.

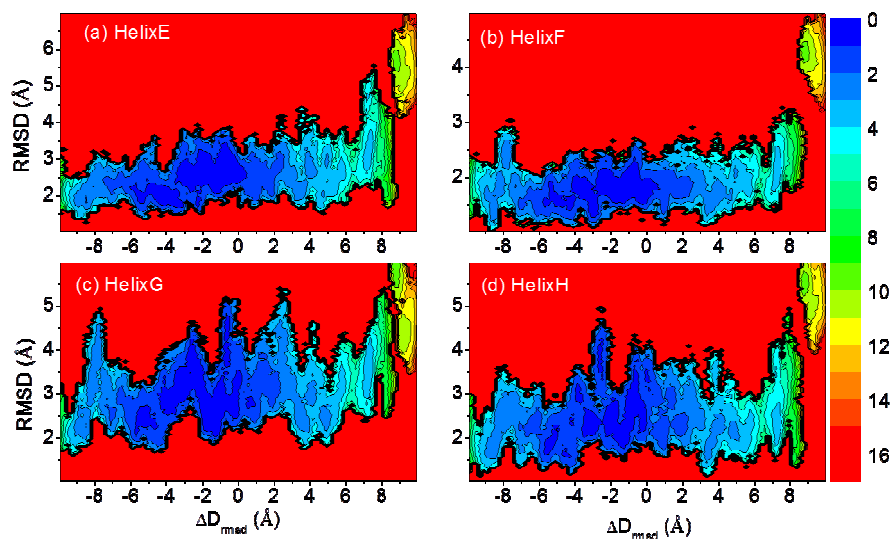

Figure S2. Two-dimensional free energy profiles as the function of  $\Delta D_{rmsd}$  of intact apo-CaM and the RMSD value of individual helices within C-terminal domain to their respective closed states. The contours are spaced at intervals of 1.0 kcal/mol.

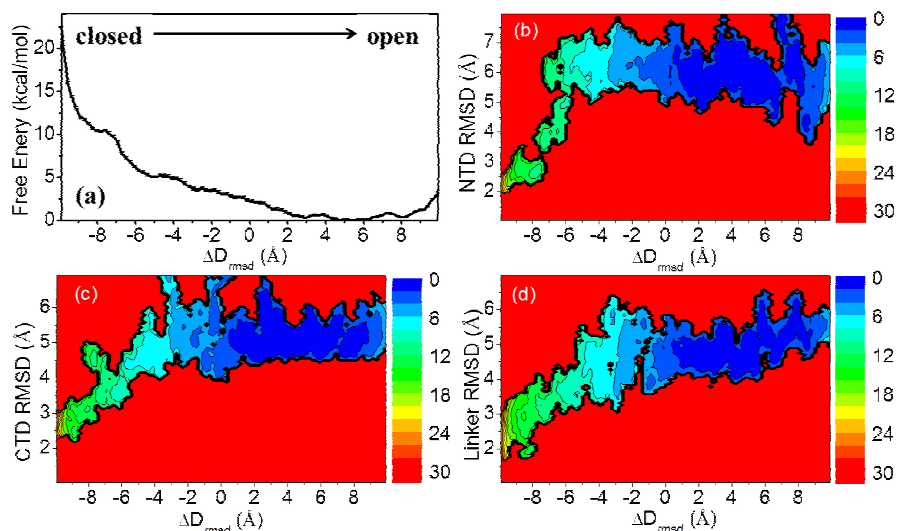

Figure S3. (a) One-dimensional free energy profiles as a function of  $\Delta D_{rmsd}$  for the conformational transition of  $\text{Ca}^{2+}$ -bound calmodulin. (b-d) Two-dimensional free energy landscapes for the conformational transition of  $\text{Ca}^{2+}$ -bound calmodulin as the function of  $\Delta D_{rmsd}$  and the RMSD value of different regions (N-terminal domain, C-terminal domain, central  $\alpha$ -helix linker) to their closed states. The contours are spaced at intervals of 2.0 kcal/mol.

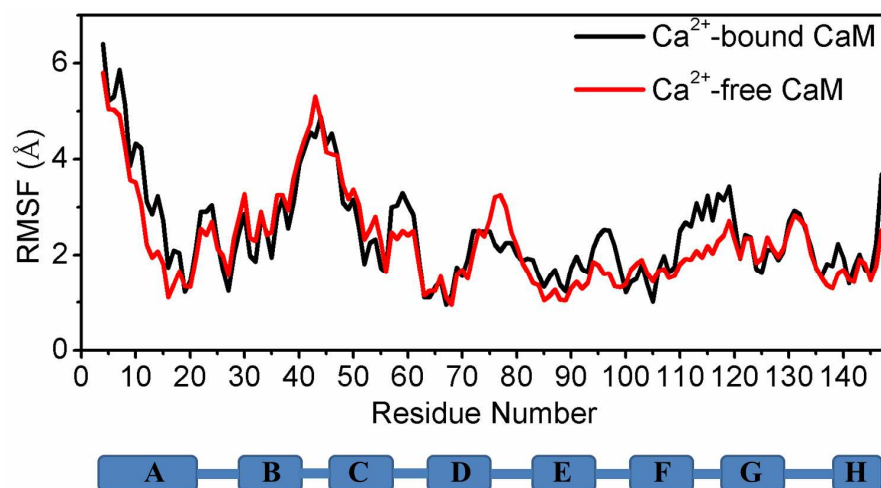

Figure S4. The root-mean-square-fluctuation (RMSF) vs sequence index in Ca<sup>2+</sup>-free and Ca<sup>2+</sup>-bound calmodulin measured from conventional MD simulation. The helix secondary structure is indicated below the plot.
